# Supplementary material for: Two-dimensional TiCl2: a high-performance anode material for Na-ion batteries with high capacity and fast diffusion
Source: Royal Society of Chemistry journal article supplement (doi:10.1039/d3cp00172e), 2023-01-01
Supplement: d3cp00172e1.pdf [file d3cp00172e1.pdf]

Supplementary Material of:

**Two-dimensional TiCl<sub>2</sub>: A high-performance anode material for Na-ion batteries with high capacity and fast diffusion**

Hong-Yao Zhu,<sup>a</sup> Xiao-Juan Ye,<sup>a</sup> Lan Meng,<sup>a</sup> Xiao-Hong Zheng,<sup>b</sup> Ran Jia,<sup>c</sup> Chun-Sheng Liu<sup>a,\*</sup>

<sup>a</sup>College of Electronic and Optical Engineering, Nanjing University of Posts and Telecommunications, Nanjing 210023, China

<sup>b</sup>College of Information Science and Technology, Nanjing Forestry University, Nanjing 210037, China

<sup>c</sup>Institute of Theoretical Chemistry, College of Chemistry, Jilin University, Changchun 130023, China

Email: cslu@njupt.edu.cn

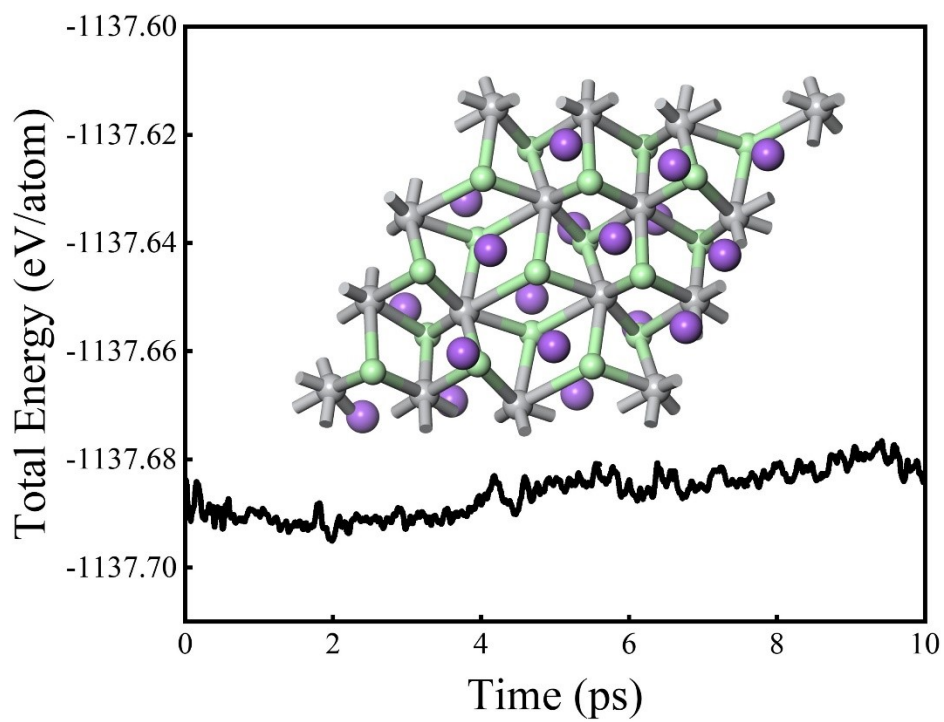

**Fig. S1.** Total energy evolution of Na<sub>2</sub>TiCl<sub>2</sub> at 300 K. The inset is the snapshot of the final configuration from the top view.

**Table S1.** Calculated differential adsorption energy ( $E_{\text{diff-ads}}$ ) with different numbers of Na adsorbed on  $\text{TiCl}_2$ .

---

| Number of Na atoms adsorbed on $\text{TiCl}_2$ | $E_{\text{diff-ads}}$ (eV) |
|------------------------------------------------|----------------------------|
| 1                                              | -1.48                      |
| 2                                              | -1.36                      |
| 3                                              | -1.18                      |
| 4                                              | -1.26                      |
| 5                                              | -1.21                      |
| 6                                              | -1.24                      |
| 7                                              | -1.19                      |
| 8                                              | -1.16                      |
| 9                                              | -1.23                      |
| 10                                             | -1.15                      |
| 11                                             | -1.20                      |
| 12                                             | -1.18                      |
| 13                                             | -1.17                      |
| 14                                             | -1.15                      |
| 15                                             | -1.19                      |
| 16                                             | -1.18                      |
| 17                                             | -1.21                      |
| 18                                             | -1.16                      |
| 19                                             | 0.14                       |

---
